# Supplementary material for: Using social marketing for the promotion of cognitive health: a scoping review protocol
Source: HighWire-hosted journal article supplement (doi:10.1136/bmjopen-2021-049947), 2021-10-01
Supplement: bmjopen-2021-049947supp001_data_supplement.pdf [file bmjopen-2021-049947supp001_data_supplement.pdf]

## Data extraction instrument

### A. General Information

|                                                                                                  |  |
|--------------------------------------------------------------------------------------------------|--|
| 1. <b>Date form completed</b><br><i>(dd/mm/yyyy)</i>                                             |  |
| 2. <b>Name/ID of person extracting data</b>                                                      |  |
| 3. <b>Report title</b><br><i>(title of paper/ abstract/ report that data are extracted from)</i> |  |
| 4. <b>Report ID</b><br><i>(if there are multiple reports of this study)</i>                      |  |
| 5. <b>Reference details</b>                                                                      |  |
| 6. <b>Report author contact details</b>                                                          |  |
| 7. <b>Publication type</b><br><i>(e.g. full report, abstract, letter)</i>                        |  |
| 8. <b>Study funding source</b><br><i>(including role of funders)</i>                             |  |
| 9. <b>Possible conflicts of interest</b><br><i>(for study authors)</i>                           |  |
| 10. <b>Notes:</b>                                                                                |  |

### B. Eligibility

| <b>Study Characteristics</b>     | <b>Review Inclusion Criteria</b><br><i>(Consider inclusion criteria for each characteristic as defined in the Protocol)</i> | <b>Yes/ No / Unclear</b> | <b>Location in text</b><br><i>(pg/fig/table)</i> |
|----------------------------------|-----------------------------------------------------------------------------------------------------------------------------|--------------------------|--------------------------------------------------|
| 11. <b>Type of study</b>         | Design (specify):                                                                                                           | ...                      |                                                  |
| 12. <b>Participants</b>          |                                                                                                                             | ...                      |                                                  |
| 13. <b>Types of intervention</b> |                                                                                                                             | ...                      |                                                  |
